# Supplementary material
Source: Springer Nature journal article supplement (https://www.springermedizin.de/resource/supplementary/12947_2009_264_MOESM11_ESM.pdf/9556574)

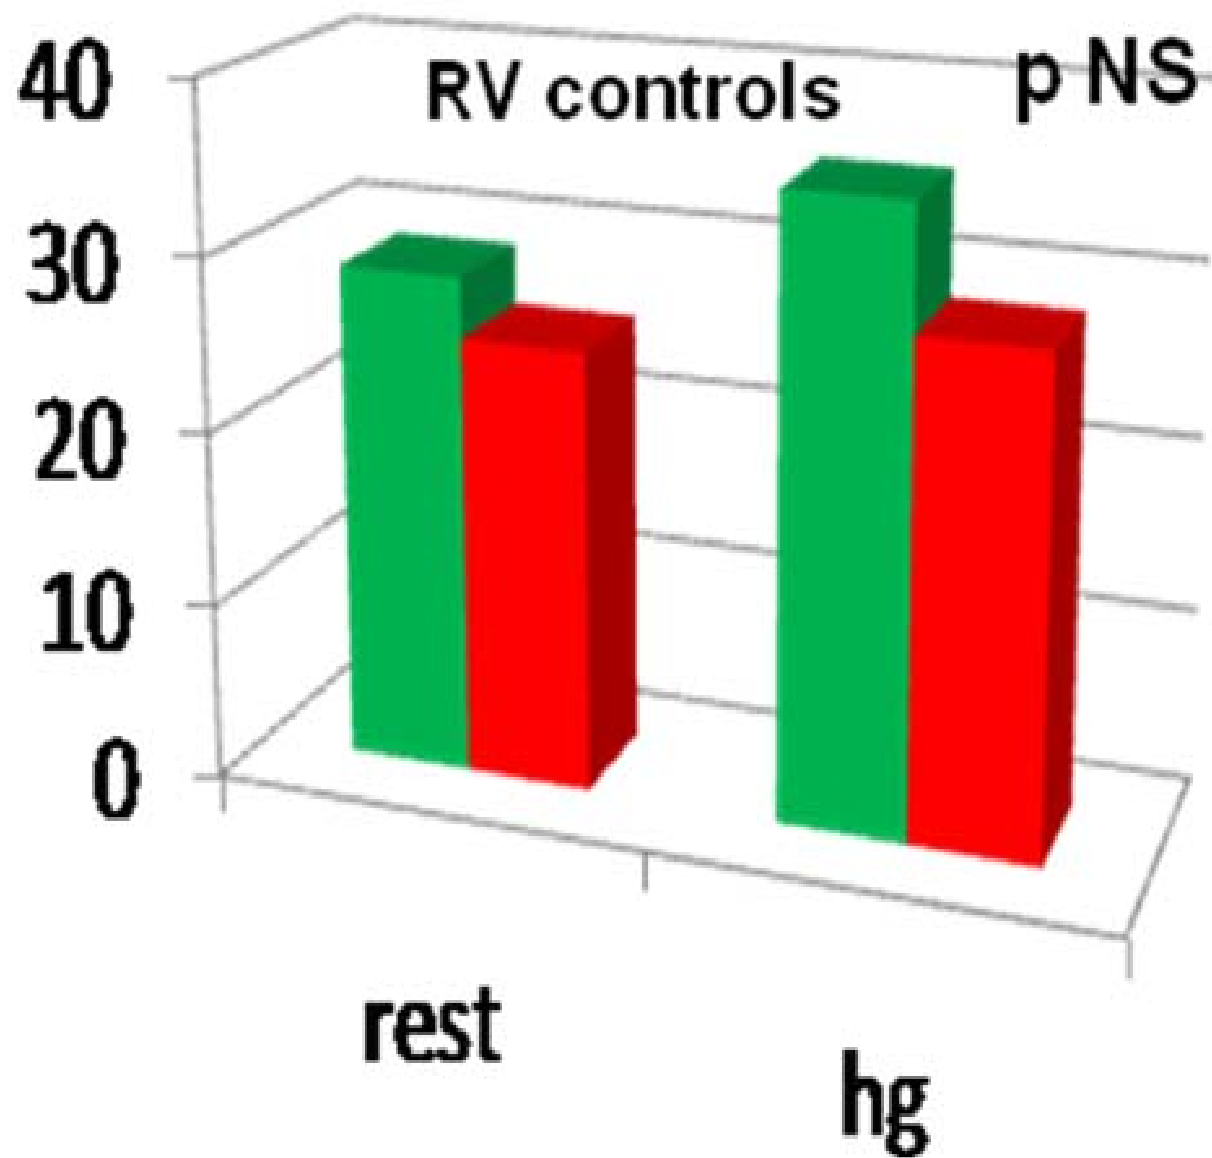

■ basal

■ apical

Supplement: MOESM11 [file 9556574]
